# Supplementary material for: The effect of a movement-to-music video program on the objectively measured sedentary time and physical activity of preschool-aged children and their mothers: A randomized controlled trial
Source: PubMed Central journal article supplement (PMC5578653; doi:10.1371/journal.pone.0183317), 2017-08-31
Supplement: pone.0183317.s001.pdf [file pone.0183317.s001.pdf]

S1 Table. Change within and between groups of mothers in sedentary behavior and physical activity over time as a proportion of measurement time (estimates, 95% confidence intervals and p-value).

Including mothers (n=130) who had acceptable accelerometer use in all three weeks.

| MOTHERS                                         | Unadjusted               |         | Adjusted*                |         |
|-------------------------------------------------|--------------------------|---------|--------------------------|---------|
|                                                 | estimate (95% CI)        | p-value | estimate (95% CI)        | p-value |
| <b>Sedentary behavior**</b>                     |                          |         |                          |         |
| difference at baseline (ref = control)          | 1.63 (-1.21 to 4.47)     | 0.258   | 1.95 (-0.88 to 4.78)     | 0.175   |
| change in time, control                         | 0.008 (-0.017 to 0.033)  | 0.521   | 0.015 (-0.012 to 0.042)  | 0.267   |
| change in time, intervention                    | -0.009 (-0.035 to 0.017) | 0.488   | -0.009 (-0.036 to 0.018) | 0.514   |
| intervention effect (ref = control)             | -0.017 (-0.054 to 0.019) | 0.346   | -0.024 (-0.062 to 0.014) | 0.214   |
| <b>Standing still**</b>                         |                          |         |                          |         |
| difference at baseline (ref = control)          | -0.65 (-2.257 to 0.962)  | 0.427   | -0.71 (-2.352 to 0.941)  | 0.398   |
| change in time, control                         | -0.007 (-0.023 to 0.010) | 0.435   | -0.010 (-0.028 to 0.008) | 0.275   |
| change in time, intervention                    | 0.011 (-0.007 to 0.028)  | 0.235   | 0.010 (-0.008 to 0.029)  | 0.272   |
| intervention effect (ref = control)             | 0.017 (-0.007 to 0.041)  | 0.163   | 0.020 (-0.006 to 0.046)  | 0.122   |
| <b>Light physical activity**</b>                |                          |         |                          |         |
| difference at baseline (ref = control)          | -0.287 (-1.690 to 1.115) | 0.686   | -0.605 (-2.096 to 0.887) | 0.424   |
| change in time, control                         | -0.004 (-0.016 to 0.008) | 0.530   | -0.006 (-0.019 to 0.007) | 0.366   |
| change in time, intervention                    | -0.001 (-0.014 to 0.011) | 0.815   | -0.002 (-0.015 to 0.012) | 0.813   |
| intervention effect (ref = control)             | 0.002 (-0.015 to 0.019)  | 0.792   | 0.004 (-0.014 to 0.023)  | 0.641   |
| <b>Moderate-to-vigorous physical activity**</b> |                          |         |                          |         |
| difference at baseline (ref = control)          | -0.693 (-1.667 to 0.281) | 0.162   | -0.635 (-1.639 to 0.370) | 0.213   |
| change in time, control                         | 0.003 (-0.005 to 0.012)  | 0.447   | 0.002 (-0.008 to 0.012)  | 0.712   |
| change in time, intervention                    | 0.001 (-0.008 to 0.010)  | 0.881   | 0.0003 (-0.010 to 0.010) | 0.956   |
| intervention effect (ref = control)             | -0.003 (-0.015 to 0.010) | 0.677   | -0.002 (-0.016 to 0.013) | 0.826   |

\* Adjusted for mother's BMI, number of children, work, disorders or symptoms, and perceived health

\*\* Proportion of measurement time
