# Supplementary material for: The effect of a movement-to-music video program on the objectively measured sedentary time and physical activity of preschool-aged children and their mothers: A randomized controlled trial
Source: PubMed Central journal article supplement (PMC5578653; doi:10.1371/journal.pone.0183317), 2017-08-31
Supplement: pone.0183317.s002.pdf [file pone.0183317.s002.pdf]

S2 Table. Change within and between groups of children in sedentary behavior and physical activity over time as a proportion of measurement time (estimates, 95% confidence intervals and p-value).

Including children (n=111) who had acceptable accelerometer use in all three weeks.

| CHILDREN                                        | Unadjusted                |              | Adjusted*                  |              |
|-------------------------------------------------|---------------------------|--------------|----------------------------|--------------|
|                                                 | estimate (95% CI)         | p-value      | estimate (95% CI)          | p-value      |
| <b>Sedentary behavior**</b>                     |                           |              |                            |              |
| difference at baseline (ref = control)          | -0.191 (-2.612 to 2.230)  | 0.876        | -0.099 (-2.513 to 2.315)   | 0.935        |
| change in time, control                         | 0.013 (-0.013 to 0.040)   | 0.329        | 0.016 (-0.011 to 0.043)    | 0.251        |
| change in time, intervention                    | 0.016 (-0.013 to 0.044)   | 0.283        | 0.015 (-0.013 to 0.043)    | 0.280        |
| intervention effect (ref = control)             | 0.002 (-0.037 to 0.041)   | 0.902        | -0.0005 (-0.040 to 0.039)  | 0.980        |
| <b>Standing still**</b>                         |                           |              |                            |              |
| difference at baseline (ref = control)          | 0.108 (-0.723 to 0.940)   | 0.797        | -0.103 (-0.951 to 0.745)   | 0.810        |
| change in time, control                         | -0.001 (-0.011 to 0.010)  | 0.907        | -0.003 (-0.013 to 0.008)   | 0.606        |
| change in time, intervention                    | -0.005 (-0.016 to 0.006)  | 0.400        | -0.004 (-0.015 to 0.006)   | 0.424        |
| intervention effect (ref = control)             | -0.004 (-0.019 to 0.011)  | 0.591        | -0.002 (-0.017 to 0.013)   | 0.828        |
| <b>Light physical activity**</b>                |                           |              |                            |              |
| difference at baseline (ref = control)          | -0.117 (-1.332 to 1.097)  | 0.848        | -0.050 (-1.277 to 1.177)   | 0.936        |
| change in time, control                         | -0.013 (-0.025 to -0.001) | <b>0.037</b> | -0.013 (-0.255 to -0.0002) | <b>0.046</b> |
| change in time, intervention                    | -0.014 (-0.027 to -0.001) | <b>0.041</b> | -0.014 (-0.027 to -0.001)  | <b>0.038</b> |
| intervention effect (ref = control)             | -0.001 (-0.019 to 0.017)  | 0.934        | -0.001 (-0.019 to 0.017)   | 0.916        |
| <b>Moderate-to-vigorous physical activity**</b> |                           |              |                            |              |
| difference at baseline (ref = control)          | 0.197 (-1.225 to 1.620)   | 0.784        | 0.247 (-1.156 to 1.650)    | 0.728        |
| change in time, control                         | -0.001 (-0.016 to 0.015)  | 0.948        | -0.001 (-0.017 to 0.015)   | 0.887        |
| change in time, intervention                    | 0.002 (-0.014 to 0.019)   | 0.784        | 0.002 (-0.014 to 0.019)    | 0.765        |
| intervention effect (ref = control)             | 0.003 (-0.020 to 0.025)   | 0.807        | 0.004 (-0.019 to 0.026)    | 0.754        |

\* Adjusted for child's BMI, daycare or preschool, and number of siblings

\*\* Proportion of measurement time
