# Supplementary material for: The effect of a movement-to-music video program on the objectively measured sedentary time and physical activity of preschool-aged children and their mothers: A randomized controlled trial
Source: PubMed Central journal article supplement (PMC5578653; doi:10.1371/journal.pone.0183317), 2017-08-31
Supplement: pone.0183317.s003.pdf [file pone.0183317.s003.pdf]

S3 Table. Change within and between groups of mothers in sedentary behavior and physical activity over time as a proportion of measurement time (estimates, 95% confidence intervals and p-value).

Including those mothers who used movement-to-music video program (based on diaries, n=9) during the last week or belonged to the control group (n=96).

| MOTHERS                                         | Unadjusted               |         | Adjusted*                 |         |
|-------------------------------------------------|--------------------------|---------|---------------------------|---------|
|                                                 | estimate (95% CI)        | p-value | estimate (95% CI)         | p-value |
| <b>Sedentary behavior**</b>                     |                          |         |                           |         |
| difference at baseline (ref = control)          | -0.39 (-6.400 to 5.617)  | 0.898   | 2.48 (-3.799 to 8.755)    | 0.434   |
| change in time, control                         | 0.008 (-0.015 to 0.033)  | 0.504   | 0.015 (-0.011 to 0.042)   | 0.245   |
| change in time, intervention                    | -0.008 (-0.077 to 0.061) | 0.824   | -0.006 (-0.079 to 0.067)  | 0.865   |
| intervention effect (ref = control)             | -0.016 (-0.089 to 0.057) | 0.666   | -0.022 (-0.099 to 0.056)  | 0.579   |
| <b>Standing still**</b>                         |                          |         |                           |         |
| difference at baseline (ref = control)          | 1.28 (-2.092 to 4.647)   | 0.454   | 1.21 (-2.427 to 4.854)    | 0.509   |
| change in time, control                         | -0.008 (-0.024 to 0.009) | 0.348   | -0.011 (-0.029 to 0.006)  | 0.199   |
| change in time, intervention                    | 0.010 (-0.037 to 0.057)  | 0.664   | -0.001 (-0.050 to 0.048)  | 0.972   |
| intervention effect (ref = control)             | 0.018 (-0.032 to 0.068)  | 0.472   | 0.011 (-0.042 to 0.063)   | 0.688   |
| <b>Light physical activity**</b>                |                          |         |                           |         |
| difference at baseline (ref = control)          | 0.331 (-2.480 to 3.143)  | 0.816   | -1.35 (-4.368 to 1.676)   | 0.378   |
| change in time, control                         | -0.003 (-0.015 to 0.009) | 0.600   | -0.005 (-0.018 to 0.008)  | 0.474   |
| change in time, intervention                    | -0.006 (-0.041 to 0.028) | 0.723   | -0.0002 (-0.037 to 0.037) | 0.992   |
| intervention effect (ref = control)             | -0.003 (-0.039 to 0.034) | 0.873   | 0.005 (-0.035 to 0.044)   | 0.817   |
| <b>Moderate-to-vigorous physical activity**</b> |                          |         |                           |         |
| difference at baseline (ref = control)          | -1.24 (-3.669 to 1.198)  | 0.316   | -2.35 (-4.937 to 0.242)   | 0.075   |
| change in time, control                         | 0.003 (-0.006 to 0.012)  | 0.524   | 0.001 (-0.009 to 0.011)   | 0.827   |
| change in time, intervention                    | 0.004 (-0.021 to 0.030)  | 0.739   | 0.008 (-0.021 to 0.036)   | 0.592   |
| intervention effect (ref = control)             | 0.001 (-0.026 to 0.028)  | 0.919   | 0.007 (-0.024 to 0.037)   | 0.666   |

\* Adjusted for mother's BMI, number of children, work, disorders or symptoms, and perceived health

\*\* Proportion of measurement time
