# Supplementary material for: The effect of a movement-to-music video program on the objectively measured sedentary time and physical activity of preschool-aged children and their mothers: A randomized controlled trial
Source: PubMed Central journal article supplement (PMC5578653; doi:10.1371/journal.pone.0183317), 2017-08-31
Supplement: pone.0183317.s004.pdf [file pone.0183317.s004.pdf]

S4 Table. Change within and between groups of children in sedentary behavior and physical activity over time as a proportion of measurement time (estimates, 95% confidence intervals and p-value).

Including those children who used movement-to-music video program (based on diaries, n=10) during the last week or belonged to the control group (n=91).

| CHILDREN                                        | Unadjusted                |              | Adjusted*                 |              |
|-------------------------------------------------|---------------------------|--------------|---------------------------|--------------|
|                                                 | estimate (95% CI)         | p-value      | estimate (95% CI)         | p-value      |
| <b>Sedentary behavior**</b>                     |                           |              |                           |              |
| difference at baseline (ref = control)          | -0.928 (-4.930 to 3.073)  | 0.646        | -0.411 (-4.271 to 3.449)  | 0.833        |
| change in time, control                         | 0.019 (-0.009 to 0.047)   | 0.173        | 0.023 (-0.005 to 0.052)   | 0.107        |
| change in time, intervention                    | -0.023 (-0.096 to 0.044)  | 0.463        | -0.028 (-0.097 to 0.040)  | 0.408        |
| intervention effect (ref = control)             | -0.045 (-0.120 to 0.030)  | 0.236        | -0.052 (-0.126 to 0.022)  | 0.166        |
| <b>Standing still**</b>                         |                           |              |                           |              |
| difference at baseline (ref = control)          | 0.230 (-1.330 to 1.790)   | 0.771        | -0.092 (-1.647 to 1.463)  | 0.906        |
| change in time, control                         | -0.003 (-0.013 to 0.008)  | 0.593        | -0.005 (-0.016 to 0.006)  | 0.373        |
| change in time, intervention                    | 0.015 (-0.011 to 0.041)   | 0.259        | 0.016 (-0.010 to 0.042)   | 0.232        |
| intervention effect (ref = control)             | 0.018 (-0.010 to 0.046)   | 0.213        | 0.021 (-0.008 to 0.047)   | 0.149        |
| <b>Light physical activity**</b>                |                           |              |                           |              |
| difference at baseline (ref = control)          | 1.050 (-0.971 to 3.071)   | 0.305        | 0.866 (-1.199 to 2.931)   | 0.407        |
| change in time, control                         | -0.015 (-0.027 to -0.003) | <b>0.018</b> | -0.015 (-0.027 to -0.002) | <b>0.020</b> |
| change in time, intervention                    | -0.005 (-0.035 to 0.024)  | 0.717        | -0.005 (-0.035 to 0.025)  | 0.156        |
| intervention effect (ref = control)             | 0.009 (-0.023 to 0.041)   | 0.567        | 0.010 (-0.022 to 0.042)   | 0.541        |
| <b>Moderate-to-vigorous physical activity**</b> |                           |              |                           |              |
| difference at baseline (ref = control)          | -0.345 (-2.817 to 2.127)  | 0.782        | -0.359 (-2.731 to 2.013)  | 0.764        |
| change in time, control                         | -0.002 (-0.018 to 0.014)  | 0.785        | -0.004 (-0.020 to 0.013)  | 0.676        |
| change in time, intervention                    | 0.017 (-0.023 to 0.057)   | 0.408        | 0.018 (-0.022 to 0.058)   | 0.369        |
| intervention effect (ref = control)             | 0.019 (-0.024 to 0.062)   | 0.385        | 0.022 (-0.022 to 0.065)   | 0.323        |

\* Adjusted for child's BMI, daycare or preschool, and number of siblings

\*\* Proportion of measurement time
